# Supplementary material for: Adios a Enrique de la Hoz.
Source: Royal Society of Chemistry journal article supplement (doi:10.1039/d1nr06019h), 1996-01-01
Supplement: d1nr06019h2.pdf [file d1nr06019h2.pdf]

## SUPPLEMENTARY INFORMATION

### Alloying dichalcogenolate-protected Ag<sub>21</sub> 8-electron nanoclusters: A DFT investigation

*Franck Gam<sup>a</sup>, Isaac Chantrenne,<sup>a</sup> Samia Kahlal<sup>a,\*</sup>, Tzu-Hao Chiu<sup>b</sup>, Jian-Hong Liao<sup>b</sup>, C. W. Liu<sup>b</sup>, Jean-Yves Saillard<sup>a</sup>.*

<sup>a</sup> Univ Rennes, CNRS, ISCR-UMR 6226, F-35000 Rennes, France

<sup>b</sup> Department of Chemistry, National Dong Hwa University, No. 1, Sec. 2, Da Hsueh Rd., Shoufeng, Hualien 974301 (Taiwan, R.O.C.).

### Content

**Table S1.** Crystallographic data for the *C*<sub>1</sub>-*I* isomer of [PtAg<sub>20</sub>{S<sub>2</sub>P(O<sup>*n*</sup>Pr)<sub>2</sub>}<sub>12</sub>] p 2

**Table S2.** Computed results for the [MAg<sub>20</sub>(S<sub>2</sub>(PH<sub>2</sub>)<sub>12</sub>)<sup>q</sup>] species. The first values correspond to structure-type *T* and the values in parentheses to structure-type *C*<sub>3</sub> (see main text). p 3

**Table S3.** Computed results for the [MAg<sub>20</sub>(Se<sub>2</sub>(PH<sub>2</sub>)<sub>12</sub>)<sup>q</sup>] species. The first values correspond to structure-type *T* and the values in parentheses to structure-type *C*<sub>3</sub> (see main text). p 4

Additional comments on experimental data on the *C*<sub>1</sub>-*I* isomer of [PtAg<sub>20</sub>{S<sub>2</sub>P(O<sup>*n*</sup>Pr)<sub>2</sub>}<sub>12</sub>] p 5

**Table S1.** Crystallographic data for the  $C_1-I$  isomer of  $[\text{PtAg}_{20}\{\text{S}_2\text{P}(\text{O}^i\text{Pr})_2\}_{12}]$ .

|                                                         |                                                                                      |
|---------------------------------------------------------|--------------------------------------------------------------------------------------|
| CCDC number                                             | 2091674                                                                              |
| Empirical formula                                       | $\text{C}_{81}\text{H}_{186}\text{Ag}_{20}\text{O}_{27}\text{P}_{12}\text{PtS}_{24}$ |
| Crystal system, space group                             | Trigonal, $R\bar{3}$                                                                 |
| a, Å                                                    | 22.7267(14)                                                                          |
| b, Å                                                    | 22.7267(14)                                                                          |
| c, Å                                                    | 27.590(2)                                                                            |
| $\alpha$ , deg.                                         | 90                                                                                   |
| $\beta$ , deg                                           | 90                                                                                   |
| $\gamma$ , deg                                          | 120                                                                                  |
| Volume, Å <sup>3</sup>                                  | 12341.2(19)                                                                          |
| Z                                                       | 3                                                                                    |
| $\rho_{\text{calcd}}$ , g·cm <sup>-3</sup>              | 2.053                                                                                |
| $\mu$ , mm <sup>-1</sup>                                | 3.637                                                                                |
| Temperature, K                                          | 100(2)                                                                               |
| $\theta_{\text{max}}$ , deg. / completeness, %          | 24.997 / 95.8                                                                        |
| Reflections collected / unique                          | 27456 / 9188 [R(int) = 0.1060]                                                       |
| Restraints / parameters                                 | 318 / 511                                                                            |
| R1 <sup>a</sup> , wR2 <sup>b</sup> [I > 2 $\sigma$ (I)] | 0.0491, 0.1194                                                                       |
| R1 <sup>a</sup> , wR2 <sup>b</sup> (all data)           | 0.0522, 0.1231                                                                       |
| Absolute structure parameter                            | 0.020(12)                                                                            |
| Goodness of fit on $F^2$                                | 1.044                                                                                |
| Largest diff. peak and hole, e/Å <sup>3</sup>           | 1.978 and -1.077                                                                     |

$${}^aR1 = \frac{\sum ||F_o| - |F_c||}{\sum |F_o|} \quad {}^b wR2 = \left\{ \frac{\sum [w(F_o^2 - F_c^2)^2]}{\sum [w(F_o^2)_2]} \right\}^{1/2}$$

**Table S2.** Computed results for the  $[\text{MAg}_{20}(\text{S}_2(\text{PH}_2)_{12})]^q$  species. The first values correspond to structure-type  $T$  and the values in parentheses to structure-type  $C_3$  (see main text).

| S          | H-L (eV)              | $\Delta E$ (kcal/mol) | $\Delta G$ (kcal/mol) |
|------------|-----------------------|-----------------------|-----------------------|
| CoAg20 I   | 1.46 (1.36)           | 0.0 (0.0)             | 0.0 (0.0)             |
| CoAg20 II  | 0.48 (0.43-0.52)      | 40.1 (33.6-39.0)      | 34.2 (28.1-34.0)      |
| CoAg20 III | 0.58 (0.32-0.58)      | 24.4 (23.3-33.3)      | 20.5 (21.1-29.0)      |
| RhAg20 I   | 1.91 (1.73)           | 0.0 (0.0)             | 0.0 (0.0)             |
| RhAg20 II  | 0.88 (0.58-0.83)      | 41.5 (38.1-38.8)      | 37.7 (35.3-36.2)      |
| RhAg20 III | 0.75 (0.45-0.73)      | 44.0 (42.2-48.9)      | 40.2 (39.4-47.0)      |
| IrAg20 I   | 2.04 (1.84)           | 0.0 (0.0)             | 0.0 (0.0)             |
| IrAg20 II  | 0.90 (0.61-0.82)      | 48.3 (46.5-54.7)      | 44.0 (40.7-50.0)      |
| IrAg20 III | 0.78 (0.49-0.78)      | 55.1 (54.9-59.4)      | 49.9 (51.1-54.8)      |
| NiAg20 I   | 1.82 (1.72)           | 0.0 (0.0)             | 0.0 (0.0)             |
| NiAg20 II  | 0.91 (0.82-0.93)      | 22.8 (18.5-22.3)      | 18.5 (16.6-19.6)      |
| NiAg20 III | 1.00 (0.80-0.97)      | 9.6 (9.1-13.8)        | 6.0 (8.1-11.8)        |
| PdAg20 I   | 1.92 (1.81)           | 0.0 (0.0)             | 0.0 (0.0)             |
| PdAg20 II  | 1.39 (1.32-1.33)      | 21.1 (20.1-21.3)      | 18.0 (18.5-19.5)      |
| PdAg20 III | 1.34 (1.10-1.31)      | 22.1 (21.4-24.0)      | 19.0 (18.5-21.1)      |
| PtAg20 I   | 2.04 (1.91)           | 0.0 (0.0)             | 0.0 (0.0)             |
| PtAg20 II  | 1.39 (1.29-1.33)      | 30.8 (27.9-30.6)      | 26.6 (26.6-28.5)      |
| PtAg20 III | 1.34 (1.05-1.31)      | 35.5 (35.2-36.3)      | 32.0 (31.6-34.0)      |
| CuAg20 I   | 1.88 (1.74)           | 4.3 (4.8)             | 7.0 (5.4)             |
| CuAg20 II  | 1.82 (1.70-1.72)      | 8.7 (8.4-9.9)         | 8.9 (7.0-8.4)         |
| CuAg20 III | 1.90 (1.66-1.75)      | 0.0 (0.0-1.7)         | 0.0 (0.0-1.1)         |
| AuAg20 I   | 2.03 (1.87)           | 0.0 (0.0)             | 0.0 (0.0)             |
| AuAg20 II  | 1.80 (1.69-1.74)      | 9.2 (9.6)             | 9.2 (9.0-9.2)         |
| AuAg20 III | 1.90 (1.68-1.76)      | 15.8 (14.7-16.0)      | 15.8 (12.7-14.9)      |
| ZnAg20 I   | 1.94 (1.72)           | 3.4 (8.8)             | 5.8 (8.1)             |
| ZnAg20 II  | 0.95 (1.66-1.73)      | 66.1 (8.0-8.8)        | 57.2 (6.6-7.1)        |
| ZnAg20 III | 1.69 (1.32-1.61)      | 0.0 (0.0-6.4)         | 0.0 (0.0-4.4)         |
| CdAg20 I   | 1.98 (1.74)           | 6.4 (9.1)             | 7.2 (9.2)             |
| CdAg20 II  | 1.76 (1.57-1.70)      | 0.0 (2.1-3.4)         | 0.0 (2.5-2.8)         |
| CdAg20 III | 1.60 (1.22-1.53)      | 6.5 (0.0-9.8)         | 5.8-6.6 (0.0-8.8)     |
| HgAg20 I   | 2.06 (1.81)           | 5.2 (6.3)             | 6.3 (4.9)             |
| HgAg20 II  | 1.57 (1.42-1.56)      | 0.0 (0.0-1.6)         | 0.0 (0.0-0.7)         |
| HgAg20 III | 0.71-1.44 (1.01-1.39) | 15.0-80.1 (5.1-16.7)  | 14.5-71.5 (5.1-15.0)  |

**Table S3.** Computed results for the  $[M\text{Ag}_{20}(\text{Se}_2(\text{PH}_2)_{12})^q]$  species. The first values correspond to structure-type  $T$  and the values in parentheses to structure-type  $C_3$  (see main text).

| Se                     | H-L (eV)         | $\Delta E$ (kcal/mol) | $\Delta G$ (kcal/mol) |
|------------------------|------------------|-----------------------|-----------------------|
| CoAg <sub>20</sub> I   | 1.36 (1.23)      | 0.0 (0.0)             | 0.0 (0.0)             |
| CoAg <sub>20</sub> II  | 0.45 (0.32-0.44) | 37.6 (35.8-37.3)      | 31.9 (29.0-31.7)      |
| CoAg <sub>20</sub> III | 0.55 (0.36-0.56) | 16.0 (20.4-25.3)      | 15.9-16.1 (15.3-21.5) |
| RhAg <sub>20</sub> I   | 1.75 (1.53)      | 0.0 (0.0)             | 0.0 (0.0)             |
| RhAg <sub>20</sub> II  | 0.81 (0.86-0.92) | 40.0 (13.1-36.0)      | 35.5 (10.9-34.0)      |
| RhAg <sub>20</sub> III | 0.77 (0.58-0.73) | 37.15 (36.7-39.6)     | 32.6-33.2 (31.8-35.6) |
| IrAg <sub>20</sub> I   | 1.86 (1.62)      | 0.0 (0.0)             | 0.0 (0.0)             |
| IrAg <sub>20</sub> II  | 0.81 (0.60-0.86) | 47.1 (41.9-48.6)      | 42.1 (38.6-41.6)      |
| IrAg <sub>20</sub> III | 0.78 (0.58-0.76) | 46.6 (39.4-48.0)      | 40.9 (33.5-42.0)      |
| NiAg <sub>20</sub> I   | 1.69 (1.51)      | 0.0 (0.0)             | 0.0 (0.0)             |
| NiAg <sub>20</sub> II  | 0.81 (0.71-0.82) | 23.9 (20.5-22.4)      | 19.7 (16.2-18.8)      |
| NiAg <sub>20</sub> III | 0.99 (0.85-0.97) | 10.2-13.5 (10.4-11.4) | 6.1-6.6 (7.5-9.5)     |
| PdAg <sub>20</sub> I   | 1.73 (1.54)      | 0.0 (0.0)             | 0.0 (0.0)             |
| PdAg <sub>20</sub> II  | 1.25 (1.14-1.17) | 20.8 (19.8-20.3)      | 17.4 (16.6-17.9)      |
| PdAg <sub>20</sub> III | 1.36 (1.10-1.31) | 19.0 (18.5-20.0)      | 15.7-16.3 (15.7-18.3) |
| PtAg <sub>20</sub> I   | 1.83 (1.62)      | 0.0 (0.0)             | 0.0 (0.0)             |
| PtAg <sub>20</sub> II  | 1.24 (1.13-1.17) | 31.9 (26.2-29.1)      | 26.6 (23.8-26.1)      |
| PtAg <sub>20</sub> III | 1.36 (1.11-1.30) | 32.6-33.2 (28.8-30.9) | 27.6 (26.7-28.3)      |
| CuAg <sub>20</sub> I   | 1.70 (1.51)      | 1.5 (1.5)             | 4.2 (1.5)             |
| CuAg <sub>20</sub> II  | 1.65 (1.50-1.51) | 7.1 (5.9-7.9)         | 7.6 (6.0-7.0)         |
| CuAg <sub>20</sub> III | 1.70 (1.49-1.53) | 0.0 (0.0-1.6)         | 0.0 (0.0-1.4)         |
| AuAg <sub>20</sub> I   | 1.83 (1.59)      | 0.0 (0.0)             | 0.0 (0.0)             |
| AuAg <sub>20</sub> II  | 1.61 (1.47-1.52) | 8.3 (8.5-8.7)         | 6.6 (6.8-7.7)         |
| AuAg <sub>20</sub> III | 1.71 (1.45-1.55) | 12.9 (12.0-12.9)      | 10.7-11.3 (11.5-12.2) |
| ZnAg <sub>20</sub> I   | 1.78 (1.54)      | 0.0 (3.8)             | 2.3 (3.8)             |
| ZnAg <sub>20</sub> II  | 1.66 (1.50-1.54) | 1.4 (4.8-4.9)         | 1.00 (4.4-4.8)        |
| ZnAg <sub>20</sub> III | 1.49 (1.17-1.41) | 0.5 (0.0-3.7)         | 0.0-0.2 (0.0-4.8)     |
| CdAg <sub>20</sub> I   | 1.80 (1.56)      | 5.3 (6.7)             | 6.4 (5.6)             |
| CdAg <sub>20</sub> II  | 1.61 (1.43-1.54) | 0.0 (0.6-1.7)         | 0.0 (0.6-0.9)         |
| CdAg <sub>20</sub> III | 1.42 (1.10-1.37) | 6.4 (0.0-7.0)         | 5.3-6.3 (0.0-7.2)     |
| HgAg <sub>20</sub> I   | 1.87 (1.60)      | 5.6 (6.6)             | 6.2 (5.9)             |
| HgAg <sub>20</sub> II  | 1.45 (1.28-1.42) | 0.0 (0.0-2.4)         | 0.0 (0.0-1.4)         |
| HgAg <sub>20</sub> III | 1.31 (0.92-1.28) | 13.7 (4.8-14.1)       | 12.3-12.9 (5.3-13.7)  |

### **Additional comments on experimental data on the $C_I-I$ isomer of $[\text{PtAg}_{20}\{\text{S}_2\text{P}(\text{O}^i\text{Pr})_2\}_{12}]$ .**

The  $C_3-I$  isomer of  $[\{\text{Pt@Ag}_{20}\}\{\text{Se}_2\text{P}(\text{O}^i\text{Pr})_2\}_{12}]$  (Figure 4) is iso-structural with  $[\text{Ag}_{21}\{\text{S}_2\text{P}(\text{O}^i\text{Pr})_2\}_{12}]^+$ . The averaged Pt-Ag<sub>ico</sub> (2.7505 Å) and Ag<sub>ico</sub>-Ag<sub>ico</sub> (2.8957 Å) distances in PtAg<sub>20</sub>-C<sub>3</sub> are slightly shorter than those in its previously reported  $C_I-I$  isomer (Pt-Ag<sub>ico</sub>: 2.7601 Å; Ag<sub>ico</sub>-Ag<sub>ico</sub>: 2.9022 Å). An opposite trend is found for the peripheral Ag<sub>ico</sub>-Ag<sub>cap</sub> (3.017 Å vs. 2.902 Å). The metal kernel is protected by 12 ligands exhibiting one binding mode,  $\mu_3: \eta^2, \eta^1$ , in the  $C_3-I$  isomer, as opposed to two binding modes,  $\mu_4: \eta^2, \eta^2$  and  $\mu_3: \eta^2, \eta^1$ , in the  $C_I-I$  isomer. The Ag-S bond lengths in the  $C_3-I$  isomer range from 2.480 to 2.587 Å, which are slightly shorter than those in  $C_I-I$  isomer (2.462-2.946 Å).

The  $^{31}\text{P}$  NMR spectrum of  $[\{\text{Pt@Ag}_{20}\}\{\text{Se}_2\text{P}(\text{O}^i\text{Pr})_2\}_{12}]$  at 293K shows only one sharp peak at 104.1ppm. It splits into four peaks with the same integration ratio at 218K. Four types of resonances correspond to the four chemical environments of the dithiophosphate ligands observed in the  $C_3-I$  structure. This result indicates that  $[\text{PtAg}_{20}\{\text{S}_2\text{P}(\text{O}^i\text{Pr})_2\}_{12}]$  tends to keep  $C_3$  symmetry in solution. Thus, no significantly different optical properties of the two isomers can be observed in solution.

In summary, two isomers of  $[\{\text{Pt@Ag}_{20}\}\{\text{Se}_2\text{P}(\text{O}^i\text{Pr})_2\}_{12}]$ , of  $C_3-I$  and  $C_I-I$  structure-type, can be obtained in different crystallization conditions, but show the same optical properties in solution. This is the first report of structure isomerism in silver or silver-rich, superatomic nanoclusters.
